# Supplementary material
Source: Springer Nature journal article supplement (http://www.springermedizin.de/resource/supplementary/12891_2007_325_MOESM1_ESM.pdf/9511056)

**Incidence among men**

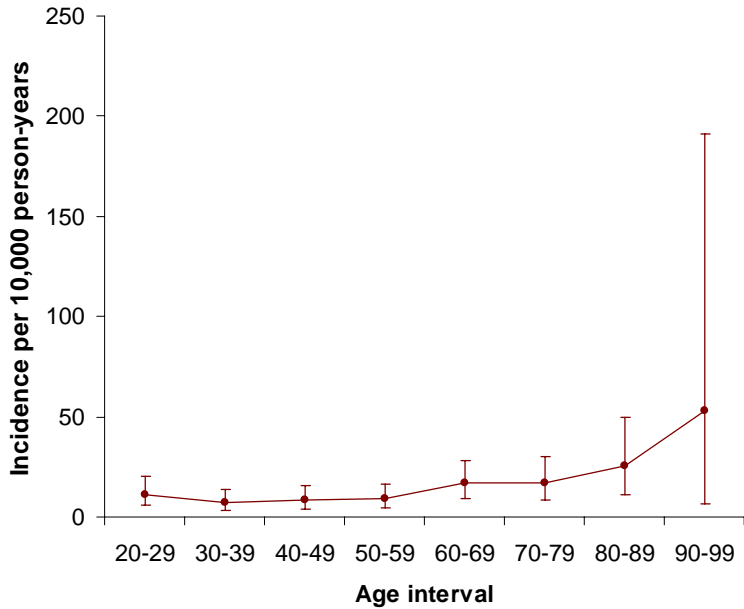

**Incidence among women**

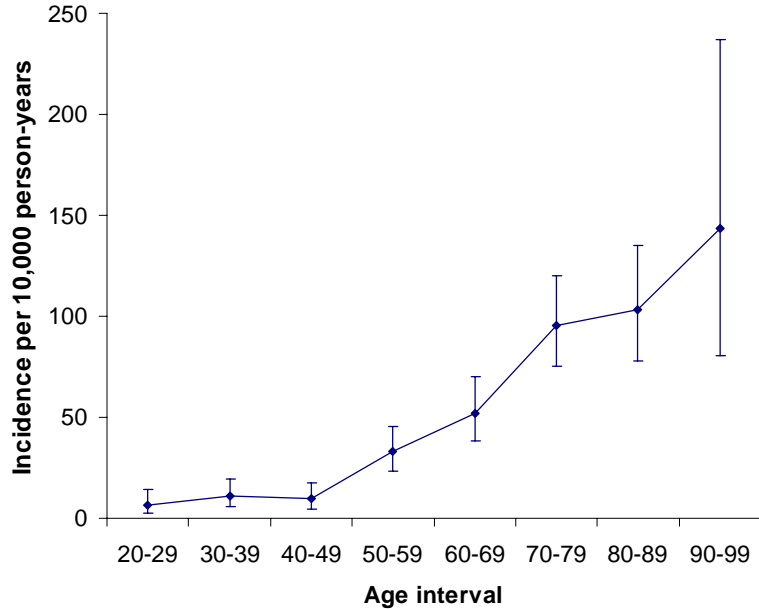

Supplement: MOESM1 [file 9511056]
